# Supplementary material for: Optimization and a Kinetic Study on the Acidic Hydrolysis of Dialkyl α-Hydroxybenzylphosphonates
Source: MDPI journal article supplement (doi:10.3390/molecules25173793), 2020-08-20
Supplement: s1 [file s1]

Supplementary Materials

# Optimization and a Kinetic Study on the Acidic Hydrolysis of Dialkyl $\alpha$ -Hydroxybenzylphosphonates

Nikoletta Harsági <sup>1</sup>, Zita Rádai <sup>1</sup>, Áron Szigetvári <sup>2</sup>, János Kóti <sup>2</sup> and György Keglevich <sup>1,\*</sup>

<sup>1</sup> Department of Organic Chemistry and Technology, Budapest University of Technology and Economics, 1521 Budapest, Hungary

<sup>2</sup> Gedeon Richter Plc., 1475 Budapest, Hungary

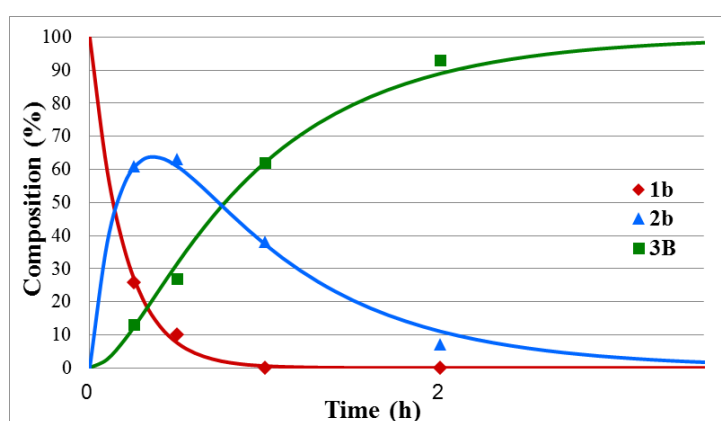

**Figure S1.** Concentration profile for the components during the hydrolysis of dimethyl  $\alpha$ -hydroxy-4-nitrobenzylphosphonate (**1b**) under optimum conditions. The  $R^2$  measure of goodness of fit is 0.989.

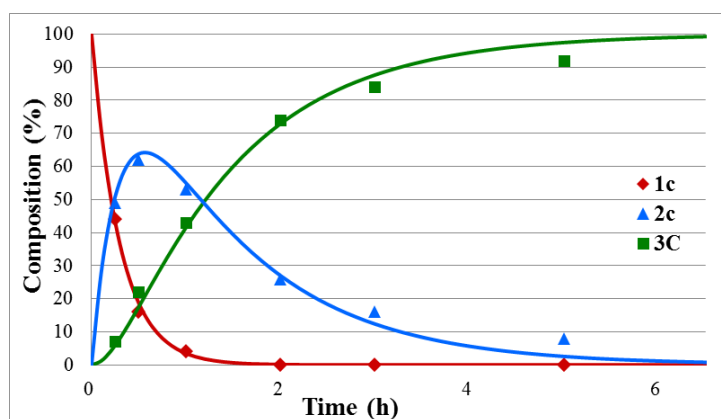

**Figure S2.** Concentration profile for the components during the hydrolysis of dimethyl  $\alpha$ -hydroxy-4-chlorobenzylphosphonate (**1c**) under optimum conditions. The  $R^2$  measure of goodness of fit is 0.987.

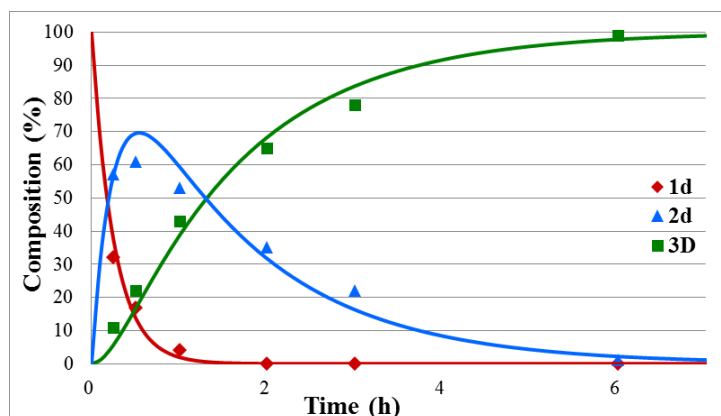

**Figure S3.** Concentration profile for the components during the hydrolysis of dimethyl  $\alpha$ -hydroxy-4-fluorobenzylphosphonate (**1d**) under optimum conditions. The  $R^2$  measure of goodness of fit is 0.965.

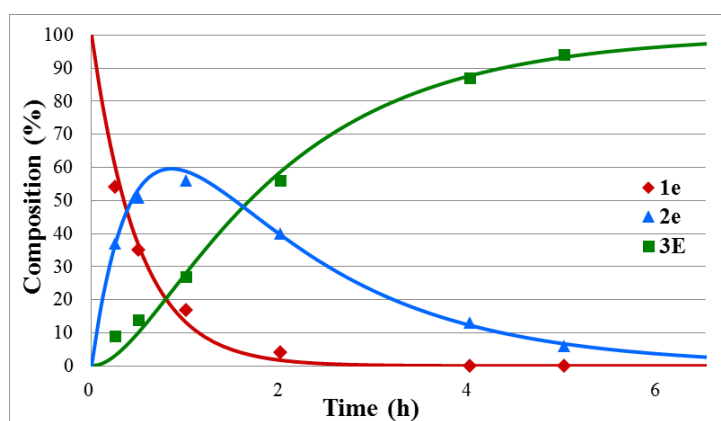

**Figure S4.** Concentration profile for the components during the hydrolysis of dimethyl  $\alpha$ -hydroxy-4-trifluoromethylbenzylphosphonate (**1e**) under optimum conditions. The  $R^2$  measure of goodness of fit is 0.988.

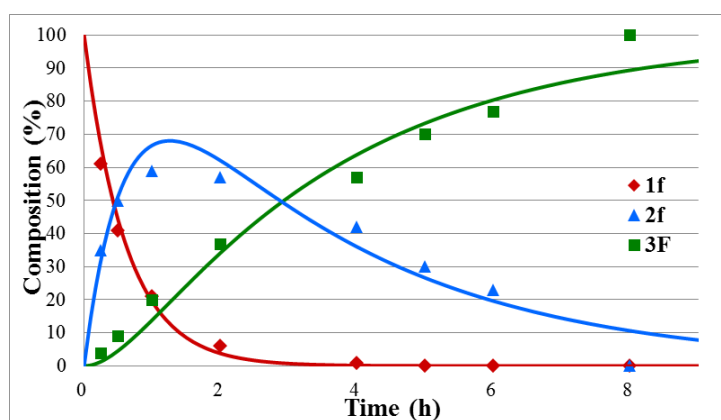

**Figure S5.** Concentration profile for the components during the hydrolysis of dimethyl  $\alpha$ -hydroxy-4-methylbenzylphosphonate (**1f**) under optimum conditions. The  $R^2$  measure of goodness of fit is 0.962.

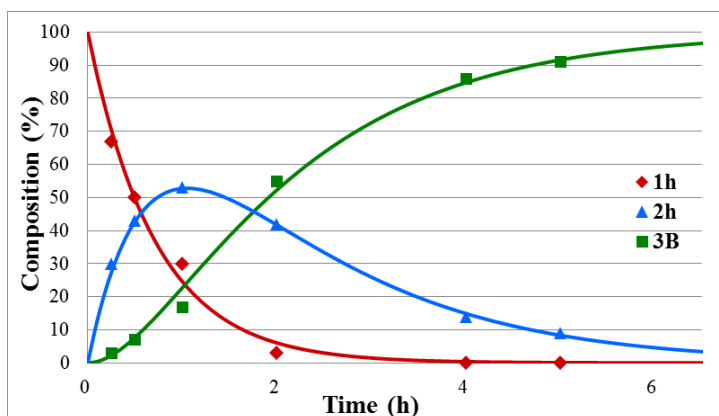

**Figure S6.** Concentration profile for the components during the hydrolysis of diethyl  $\alpha$ -hydroxy-4-nitrobenzylphosphonate (**1h**) under optimum conditions. The  $R^2$  measure of goodness of fit is 0.992.

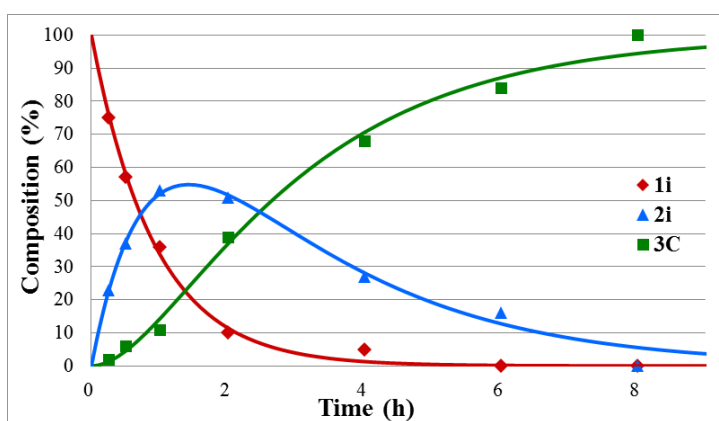

**Figure S7.** Concentration profile for the components during the hydrolysis of diethyl  $\alpha$ -hydroxy-4-chlorobenzylphosphonate (**1i**) under optimum conditions. The  $R^2$  measure of goodness of fit is 0.992.

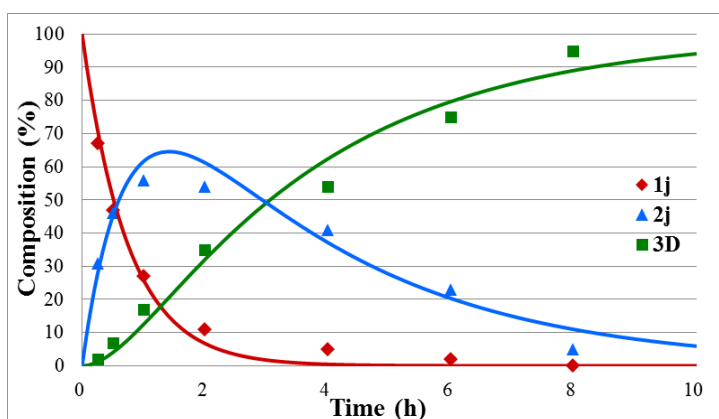

**Figure S8.** Concentration profile for the components during the hydrolysis of diethyl  $\alpha$ -hydroxy-4-fluorobenzylphosphonate (**1j**) under optimum conditions. The  $R^2$  measure of goodness of fit is 0.970.

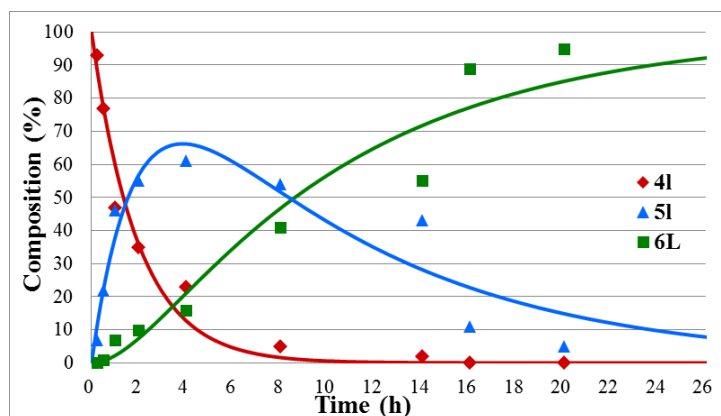

**Figure S9.** Concentration profile for the components during the hydrolysis of diethyl  $\alpha$ -phenylethylphosphonate (**4l**) under optimum conditions. The  $R^2$  measure of goodness of fit is 0.940.

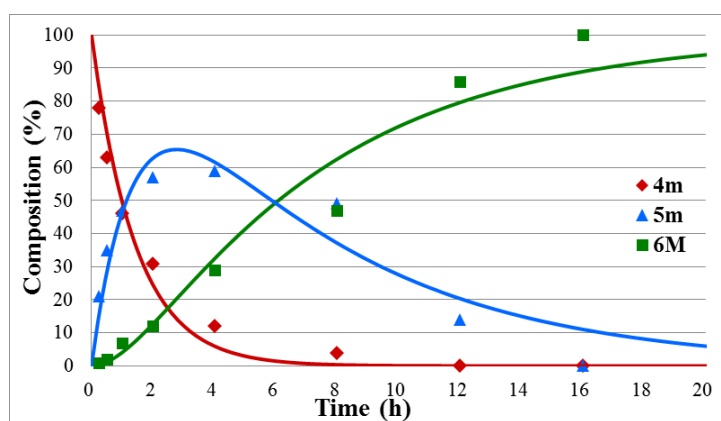

**Figure S10.** Concentration profile for the components during the hydrolysis of diethyl  $\beta$ -phenylethylphosphonate (**4m**) under optimum conditions. The  $R^2$  measure of goodness of fit is 0.949.
